# Supplementary material for: Differentiating wild from captive animals: an isotopic approach
Source: PeerJ journal article supplement (doi:10.7717/peerj.16460), 2023-11-24

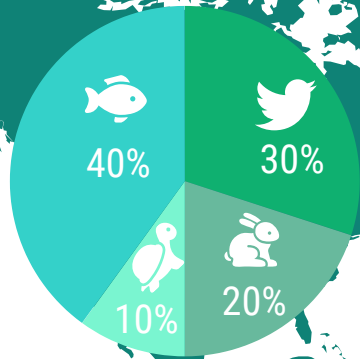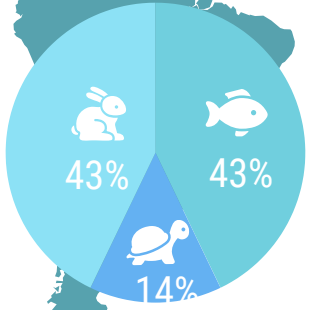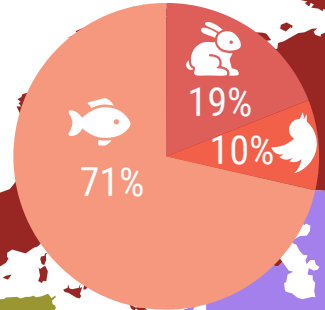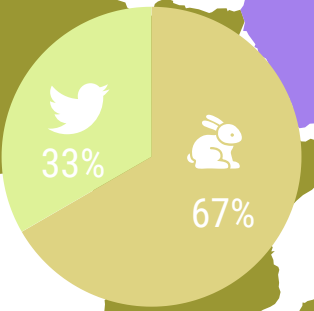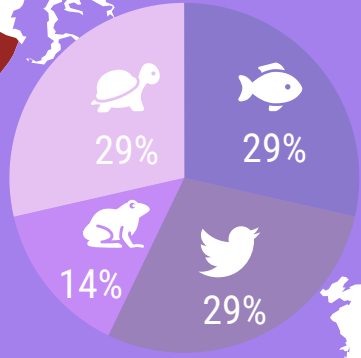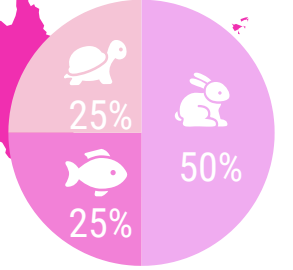

Supplement: Suplemental_Figure_S1.pdf [file Suplemental_Figure_S1.pdf]
