# Supplementary material for: Differentiating wild from captive animals: an isotopic approach
Source: PeerJ. 2023 Nov 24;11:e16460. doi: 10.7717/peerj.16460 (PMC10680447; doi:10.7717/peerj.16460)
Supplement: Supplemental Information 1 [file peerj-11-16460-s001.xlsx]

## Sheet: Database
Table S1. Database of stable isotopes publications in wild and captive vertebrates
REFERENCE	TAXON GROUP	TAXON	LIFE-STAGE	SIZE_RANGE (cm) OR WEIGHT (Kg)	DIET	CONTINENT	MULTIPLES COUNTRIES?	COUNTRY/REGION	REGION/CITY	LAT	LONG	MONTH/ PERIOD	YEAR	TISSUE	SUBTISSUE	SYSTEM	SUBGROUP	N	BREEDING SYSTEM CHANGE (MONTH)	Mean δ13C (‰)	SD δ13C (‰)	Min δ13C (‰)	Max δ13C (‰)	Range δ13C (‰)	Mean δ15N (‰)	SD δ15N (‰)	Min δ15N (‰)	Max δ15N (‰)	Range δ15N (‰)	Mean δ2H (‰)	SD δ2H (‰)	Min δ2H (‰)	Max δ2H (‰)	Range δ2H (‰)	Mean δ18O (‰)	SD δ18O (‰)	Min δ18O (‰)	Max δ18O (‰)	Range δ18O (‰)	Mean δ34S (‰)	SD δ34S (‰)	Min δ34S (‰)	Max δ34S (‰)	Range δ34S (‰)	LIPID EXTACTION	ANALYTICAL ERROR (‰)	REFERENCE STANDARD	OBSERVAÇÕES	RELATED PUBLICATION
Alexander et al., 2019	Bird	Psittacus erithacus	Adult		Herbivore	Africa	Yes	Cameroon, DRC, Gabon, Kenya, Liberia, Nigeria, Principe and Unganda	Degama, Oguta, Nkongsamba, Bafang, Bella Vista, Kango, Lambarene, Ogwe river, Boma, Kama, Kananga, Lake Tanganyika, Kayunga, Bulago, Kakamega and Baraka	1.43104	11.8629		1899 - 1946 (H); 2010 (C)	Feather	Tail	Wild		42	0	-22.1	1.1	-24.6	-19.5	5.1	6.47	2.22	0.36	14.07	13.71	-62.9	14.5	-92.3	-38.3												Yes		V-PDB; VSMOW		https://doi.org/10.1111/acv.12445
Alexander et al., 2019	Bird	Psittacus erithacus	Adult		Herbivore	Africa	Yes	Liberia		6.42805	-9.4295			Feather	Tail	Wild		3	0					0					0	-53.6	13.9														Yes
Alexander et al., 2019	Bird	Psittacus erithacus	Adult		Herbivore	Africa	Yes	Nigeria	Degama	4.76865	6.58143			Feather	Tail	Wild		6	0					0					0	-76.9	9.6														Yes
Alexander et al., 2019	Bird	Psittacus erithacus	Adult		Herbivore	Africa	Yes	Nigeria	Oguta	5.72132	6.82806			Feather	Tail	Wild		1	0					0					0	-79.7															Yes
Alexander et al., 2019	Bird	Psittacus erithacus	Adult		Herbivore	Africa	Yes	Cameroon	Nkongsamba	4.97412	9.93533			Feather	Tail	Wild		1	0					0					0	-78.2															Yes
Alexander et al., 2019	Bird	Psittacus erithacus	Adult		Herbivore	Africa	Yes	Cameroon	Bafang	5.16014	10.1871			Feather	Tail	Wild		4	0					0					0	-73	7.9														Yes
Alexander et al., 2019	Bird	Psittacus erithacus	Adult		Herbivore	Africa	Yes	Principe	Bella Vista	0.18636	6.61308			Feather	Tail	Wild		2	0					0					0	-61.7															Yes
Alexander et al., 2019	Bird	Psittacus erithacus	Adult		Herbivore	Africa	Yes	Gabon	Kango	0.170226	10.1087			Feather	Tail	Wild		1	0					0					0	-79.4															Yes
Alexander et al., 2019	Bird	Psittacus erithacus	Adult		Herbivore	Africa	Yes	Gabon	Lambarene	-0.701546	10.2404			Feather	Tail	Wild		2	0					0					0	-79.4															Yes
Alexander et al., 2019	Bird	Psittacus erithacus	Adult		Herbivore	Africa	Yes	Gabon		-0.800386	11.5652			Feather	Tail	Wild		1	0					0					0	-62															Yes
Alexander et al., 2019	Bird	Psittacus erithacus	Adult		Herbivore	Africa	Yes	Gabon	Ogwe river	-0.85244	12.2634			Feather	Tail	Wild		1	0					0					0	-69															Yes
Alexander et al., 2019	Bird	Psittacus erithacus	Adult		Herbivore	Africa	Yes	Democratic Republic of Congo	Boma	-5.83962	13.0703			Feather	Tail	Wild		1	0					0					0	-68.7															Yes
Alexander et al., 2019	Bird	Psittacus erithacus	Adult		Herbivore	Africa	Yes	Democratic Republic of Congo	Kama	-5.41244	18.3814			Feather	Tail	Wild		2	0					0					0	-52.4															Yes
Alexander et al., 2019	Bird	Psittacus erithacus	Adult		Herbivore	Africa	Yes	Democratic Republic of Congo	Kananga	-5.89797	22.4163			Feather	Tail	Wild		4	0					0					0	-61	11.8														Yes
Alexander et al., 2019	Bird	Psittacus erithacus	Adult		Herbivore	Africa	Yes	Democratic Republic of Congo	Lake Tanganyika	-7.89451	30.5143			Feather	Tail	Wild		2	0					0					0	-50.8															Yes
Alexander et al., 2019	Bird	Psittacus erithacus	Adult		Herbivore	Africa	Yes	Uganda		1.22767	32.1525			Feather	Tail	Wild		1	0					0					0	-57															Yes
Alexander et al., 2019	Bird	Psittacus erithacus	Adult		Herbivore	Africa	Yes	Uganda	Kayunga	1.30432	33.1542			Feather	Tail	Wild		2	0					0					0	-53.1															Yes
Alexander et al., 2019	Bird	Psittacus erithacus	Adult		Herbivore	Africa	Yes	Uganda	Bulago	0.567367	33.7243			Feather	Tail	Wild		5	0					0					0	-49.6	12.5														Yes
Alexander et al., 2019	Bird	Psittacus erithacus	Adult		Herbivore	Africa	Yes	Kenya	Kakamega	0.400904	34.4669			Feather	Tail	Wild		1	0					0					0	-49.7															Yes
Alexander et al., 2019	Bird	Psittacus erithacus	Adult		Herbivore	Africa	Yes	Kenya	Baraka	-0.603152	35.9121			Feather	Tail	Wild		1	0					0					0	-45.5															Yes
Alexander et al., 2019	Bird	Psittacus erithacus	Adult		Herbivore	Africa	Yes	Kenya		-0.108658	36.2567			Feather	Tail	Wild		1	0					0					0	-45															Yes
Alexander et al., 2019	Bird	Psittacus erithacus	Adult		Herbivore	Africa	Yes	South Africa		-30.5595	22.9375		2014-2015	Feather	Tail	Captive		50	>12	-19	1.4	-22.3	-15.6	6.7	6.63	1.63	2.97	10.81	7.84	-39.2	15.8	-82.1	-12.3												Yes
Alexander et al., 2019	Bird	Psittacus erithacus	Adult		Herbivore	Africa	Yes	Democratic Republic of Congo		-4.24076	21.7674		2010	Feather	Tail	Presumed wild		100		-22	0.9	-23.4	-17.8	5.6	6.85	1.67	3.85	11.53	7.68	-61	13.6	-105.7	-33.1												Yes
Anderson et al, 2010	Fish	Oncorhynchus tshawytscha; Oncorhynchus kisutch; Salmo salar			Carnivore								2006-2008	Muscle		Wild		64	0					0					0																		PDB; AIR
Anderson et al, 2010	Fish	Oncorhynchus tshawytscha; Oncorhynchus kisutch; Salmo salar			Carnivore								2006-2008	Muscle		Captive		81	0					0					0
Andersson et al., 2021	Bird	Cacatua sulphurea			Herbivore	Asia	No	China	Hong Kong	22.3193	114.169		2015-2020	Feather	Flight and body	Wild		30	0	-23.8	0.86	-25.8	-22.7	3.1	6.9	1.15	5.2	10.2	5																Yes	C and N: <0.2	V-PDB; AIR		doi:10.1111/acv.12705
Andersson et al., 2021	Bird	Cacatua sp.			Herbivore	Asia	No	China	Hong Kong	22.3193	114.169			Feather	Fligth and crest	Captive		30	> 12	-21.2	1.73	-24.9	-18.1	6.8	5.4	0.81	3.6	6.9	3.3																Yes			*Utilizadam 5 espécies de cacatua de cativeiro (não diferiram entre si)
Brandis et al., 2018	Mammal	Tachyglossus aculeatus	Adult		Carnivore	Oceania	No	Australia	Sydney, Mogo	-33.8688	151.209			Quill		Wild		11	0 - 0.87	-22.46	1.64	-24.2	-18.56	5.64	5.32	1.05	4.2	7.16	2.96																				https://doi.org/10.1038/s41598-018-33786-0
Brandis et al., 2018	Mammal	Tachyglossus aculeatus	Adult		Carnivore	Oceania	No	Australia	Sydney	-33.8688	151.209			Quill		Captive		12	22 - 240	-18.29	3.54	-23.28	-13.98	9.3	9.59	2.14	7.2	11.62	4.42
Busetto et al., 2008	Fish	Psetta maxima		0.58 ± 0.15 kg	Carnivore	Europe	Yes	Denmark	Northeast Atlantic Ocean (FAO zone nº 27)	56.4129	8.15285	Mar; Jun; Oct Feb	2006 2007	Muscle		Wild		15	0	-18.98	1.59	-21.58	-15.88	5.7	14.48	1.32	12.66	17.74	5.08																	C: ±0.05 N: ±0.08	V-PDB; AIR		10.1021/jf0734267
Busetto et al., 2008	Fish	Psetta maxima		0.64 ± 0.07 kg	Carnivore	Europe	Yes	Netherlands	Northeast Atlantic Ocean (FAO zone nº 27)	52.258	4.20689	Mar; Jun; Oct Feb	2006 2007	Muscle		Wild		15	0	-17.33	0.81	-19.56	-16.5	3.06	16.81	0.93	14.14	17.87	3.73
Busetto et al., 2008	Fish	Psetta maxima		0.67 ± 0.09 kg	Carnivore	Europe	Yes	Spain	Galicia	42.5751	-8.13386	Mar; Jun; Oct Feb	2006 2007	Muscle		Captive		30	0	-19.27	0.33	-20.01	-18.75	1.26	13.82	0.71	12.18	15.04	2.86
Cardona et al., 2017	Mammal	Otaria flavescens	Adult		Carnivore	South America	Yes	Argentina	Northern and central Patagonia	-43.9101	-67.3945		2006 - 2011	Vibrissae		Wild		10	0	-13.01	0.76	-14.69	-11.05	3.64	20.93	0.94	18.88	23.14	4.26																Yes	C: 0.10 N: 0.30	V-PDB; AIR	The values integrate around 3 month before to the collections
Cardona et al., 2017	Mammal	Otaria flavescens	Adult		Carnivore	Europe	Yes	Spain	Valencia	39.4699	-0.376288	Feb	2012	Vibrissae		Captive		2	> 26	-16.4	0.29	-16.86	-15.35	1.51	16.02	0.35	14.69	16.73	2.04																Yes			Collected in 2012 February, but values integrates animals' diet from October 2011 until February 2012
Castelli and Reed, 2017	Bird	Colinus virginianus	Subadult and adult		Herbivore	North America	No	United States	New Jersey	40.0583	-74.4057		1998 - 2006	Feather	Wing	Wild		22	0	-22.34	0.39			0	5.71	0.24			0											5.39	0.2				Yes				10.1002/wsb.746
Castelli and Reed, 2017	Bird	Colinus virginianus	Subadult and adult		Herbivore	North America	No	United States	New Jersey	40.0583	-74.4057		2004-2005	Feather	Wing	Captive	Bush Farm	42	0	-15.89	0.05			0	5.38	0.04			0											1.71	0.24				Yes
Castelli and Reed, 2017	Bird	Colinus virginianus	Subadult and adult		Herbivore	North America	No	United States	New Jersey	40.0583	-74.4057		2004-2005	Feather	Wing	Captive	Eagle Manor	20	0	-20.07	0.02			0	3.72	0.53			0											3.8	0.07				Yes
Castelli and Reed, 2017	Bird	Colinus virginianus	Subadult and adult		Herbivore	North America	No	United States	New Jersey	40.0583	-74.4057		2004-2005	Feather	Wing	Captive	Game Creek	20	0	-18.14	0.04			0	4.41	0.57			0											3.13	0.06				Yes
Chaguri et al, 2017	Fish	Argyrosomus regius			Carnivore	Europe	No	Portugal		39.4005	-8.22358			Muscle		Wild	Small (<1kg)	5	0	-18.05	0.55			0	15.45	0.14			0																	Not informed	V-PDB; AIR		http://dx.doi.org/10.1111/jfpp.13312
Chaguri et al, 2017	Fish	Argyrosomus regius			Carnivore	Europe	No	Portugal	Olhão	37.0282	-7.84269			Muscle		Captive	Small (<1kg)	10	0	-21.23	0.17			0	10.43	0.13			0
Chaguri et al, 2017	Fish	Argyrosomus regius			Carnivore	Europe	No	Portugal		39.4005	-8.22358			Muscle		Wild	Large (>1kg)	5	0	-17.08	0.67			0	19.29	0.1			0
Chaguri et al, 2017	Fish	Argyrosomus regius			Carnivore	Europe	No	Portugal	Olhão	37.0282	-7.84269			Muscle		Captive	Large (>1kg)	13	0	-21.26	0.24			0	10.29	0.1			0
Codron et al., 2013	Mammal	Loxodonta africana	Subadult and adult		Herbivore	Africa	No	South Africa	Kruger National Park (northern)	-23.4674	31.208	All year		Hair		Wild		8	0	-19.73	1.4	-22.56	-16.32	6.24	5.84	0.86	3.4	7.99	4.59																	C: < 0.10; N: < 0.30	V-PDB; AIR		https://doi.org/10.1139/cjz-2012-0155
Codron et al., 2013	Mammal	Loxodonta africana	Subadult and adult		Herbivore	Africa	No	South Africa	Kruger National Park (southern)	-25.3209	31.4328	All year		Hair		Wild		11	0	-20.72	1.87	-23.93	-16	7.93	7.18	1.84	3.96	13.72	9.76
Codron et al., 2013	Mammal	Loxodonta africana	Subadult and adult		Herbivore	Africa	No	South Africa	Limpopo	-23.4013	29.4179	Jul	2008	Hair		Wild		7	0	-22.12	0.88	-23.48	-19.15	4.33	10.15	0.67	9	11.62	2.62
Codron et al., 2013	Mammal	Loxodonta africana	Subadult and adult		Herbivore	Africa	No	South Africa	Elephants for Africa Forever and Tzaneen	-23.5928	30.0984	Jul	2008	Hair		Captive		3	0-16.53	-19.52	0.81	-21.22	-16.44	4.78	4.57	0.48	3.59	5.56	1.97
Cree et al., 1999	Reptile	Sphenodon punctatus	Adult	19.3-26.6 cm SVL	Carnivore	Oceania	No	New Zeland	Stephens Island	-40.6562	174.002	Feb	1992	Blood	RBC	Wild		5	0	-22.01	0.87	-23.47	-21.36	2.11					0																	C: ± 0.1	V-PDB		https://doi.org/10.1080/03014223.1999.951819
Cree et al., 1999	Reptile	Sphenodon punctatus	Adult	18.0-23.5 cm SVL	Carnivore	Oceania	No	New Zeland	Stephens Island	-40.6562	174.002	Feb	1992	Blood	RBC	Wild		5	0	-23.48	0.51	-23.98	-22.65	1.33					0
Cree et al., 1999	Reptile	Sphenodon punctatus	Subadult	10.1-23.5 cm SVL	Carnivore	Oceania	No	New Zeland	Stephens Island	-40.6562	174.002	Feb	1992	Blood	RBC	Wild		5	0	-23.49	1.11	-24.68	-22.03	2.65					0
Cree et al., 1999	Reptile	Sphenodon punctatus	Adult	19.3-26.6 cm SVL	Carnivore	Oceania	No	New Zeland	Stephens Island	-40.6562	174.002	Aug	1992	Blood	RBC	Wild		5	0	-23.42	0.85	-24.43	-22.51	1.92					0
Cree et al., 1999	Reptile	Sphenodon punctatus	Adult	18.0-23.5 cm SVL	Carnivore	Oceania	No	New Zeland	Stephens Island	-40.6562	174.002	Aug	1992	Blood	RBC	Wild		5	0	-23.56	0.27	-23.92	-23.22	0.7					0
Cree et al., 1999	Reptile	Sphenodon punctatus	Subadult	10.1-23.5 cm SVL	Carnivore	Oceania	No	New Zeland	Stephens Island	-40.6562	174.002	Aug	1992	Blood	RBC	Wild		5	0	-23.48	0.6	-24.27	-22.84	1.43					0
Cree et al., 1999	Reptile	Sphenodon punctatus	Adult	19.3-26.6 cm SVL	Carnivore	Oceania	No	New Zeland	Stephens Island	-40.6562	174.002	Nov	1992	Blood	RBC	Wild		5	0	-22.74	1.17	-23.74	-20.71	3.03					0
Cree et al., 1999	Reptile	Sphenodon punctatus	Adult	18.0-23.5 cm SVL	Carnivore	Oceania	No	New Zeland	Stephens Island	-40.6562	174.002	Nov	1992	Blood	RBC	Wild		5	0	-23.54	0.8	-24.93	-23.06	1.87					0
Cree et al., 1999	Reptile	Sphenodon punctatus	Subadult	10.1-23.5 cm SVL	Carnivore	Oceania	No	New Zeland	Stephens Island	-40.6562	174.002	Nov	1992	Blood	RBC	Wild		5	0	-23.62	0.35	-23.96	-23.05	0.91					0
Cree et al., 1999	Reptile	Sphenodon punctatus	Adult		Carnivore	Oceania	No	New Zeland	Stephens Island	-40.6562	174.002	Feb; Aug; Nov	1984; 1986; 1994	Muscle	Tail	Wild		3	0	-23.6	1.21244	-24.3	-22.9	1.4					0
Cree et al., 1999	Reptile	Sphenodon punctatus	Adult	23.9-28.8 cm SVL	Carnivore	Oceania	No	New Zeland	Masterton, Wellington and Invercargill	-42.9967	171.878	Feb	1992	Blood	RBC	Captive	Large males	5	84-264	-23.26	0.56	-23.85	-22.5	1.35					0
Cree et al., 1999	Reptile	Sphenodon punctatus	Adult	21.4-21.8 cm SVL	Carnivore	Oceania	No	New Zeland	Wellington	-41.3212	174.786	Feb	1992	Blood	RBC	Captive	Small males	4	0	-20.69	0.2	-20.88	-20.48	0.4					0
Cree et al., 1999	Reptile	Sphenodon punctatus	Adult	20.3-22.8 cm SVL	Carnivore	Oceania	No	New Zeland	Masterton, Wellington and Invercargill	-42.9967	171.878	Feb	1992	Blood	RBC	Captive	Females	5	84-216	-23.47	0.75	-24.4	-22.4	2					0
Cree et al., 1999	Reptile	Sphenodon punctatus	Subadult	9.5-15.9 cm SVL	Carnivore	Oceania	No	New Zeland	Masterton, Wellington and Invercargill	-42.9967	171.878	Feb	1992	Blood	RBC	Captive	Subadults	4	0	-23.33	0.52	-24.14	-22.83	1.31					0
Dempson and Power, 2004	Fish	Salmo salar	Adult (one-year-winter)		Carnivore	North America	No	Canada	Newfoundland	48.6065	-56.333	Jun	2001	Adipose fin		Wild	Angling	49		-19.99	0.33	-20.82	-19.37	1.45	12.26	0.48	11.41	13.64	2.23																No	C and N: <0.1	PDB; AIR		https://doi.org/10.1111/j.1600-0633.2004.00057.x
Dempson and Power, 2004	Fish	Salmo salar	Adult (one-year-winter)		Carnivore	North America	No	Canada	Newfoundland	48.6065	-56.333	Jun-Jul	2001	Adipose fin		Wild	Fence trap	93		-19.84	0.23	-20.51	-19.27	1.24	12.18	0.52	10.96	14.59	3.63																No
Dempson and Power, 2004	Fish	Salmo salar	Adult (repeat spawning)		Carnivore	North America	No	Canada	Newfoundland	48.6065	-56.333	Jun-Jul	2001	Adipose fin		Wild	Fence trap	6		-19.47	0.28	-19.79	-19.11	0.68	14.62	0.66	14.02	15.63	1.61																No
Dempson and Power, 2004	Fish	Salmo salar	Adult (one-year-winter)		Carnivore	North America	No	Canada	Newfoundland	48.6065	-56.333	Jun	2001	Muscle		Wild	Angling	49		-20.51	0.23	-21.1	-19.94	1.16	12.75	0.38	12.04	14.04	2																No
Dempson and Power, 2004	Fish	Salmo salar	Adult		Carnivore	North America	No	Canada	Newfoundland	48.6065	-56.333	Jul	2001	Muscle		Captive		10		-19.25	0.17	-19.6	-18.97	0.63	10.96	0.19	10.54	11.17	0.63																No
Dempson and Power, 2004	Fish	Salmo salar	Adult		Carnivore	North America	No	Canada	New Brunswick	46.5653	-66.4619	Jul	2001	Muscle		Captive		5		-18.96	0.04	-19.02	-18.93	0.09	10.27	0.52	9.73	11.13	1.4																No
Dempson and Power, 2004	Fish	Salmo salar	Adult		Carnivore	North America	No	Canada	Nova Scotia	44.685	-63.7485	Jul	2001	Muscle		Captive		5		-18.73	0.08	-18.81	-18.64	0.17	10.34	0.24	9.97	10.63	0.66																No
Dittrich et al., 2017	Amphibian	Fejervarya cancrivora	Adult	8.64 ± 0.43 cm	Carnivore	Asia	Yes	Indonesia		-1.002	114.076			Muscle		Presumed wild		32		-22.7	2	-25.32	-17.37	7.95	9	1.4	6.36	12.17	5.81																	C and N (muscle) : <0.15	V-PDB; AIR	The "size range" refers to the leg length	https://doi.org/10.1002/ece3.2878
Dittrich et al., 2017	Amphibian	Limnonectes macrodon	Adult	9.47 ± 0.65 cm	Carnivore	Asia	Yes	Indonesia		-1.002	114.076			Muscle		Presumed wild		13		-24.1	0.9	-25.13	-21.75	3.38	7.4	1.4	5.74	11.24	5.5
Dittrich et al., 2017	Amphibian	Hoplobatrachus rugulosus	Adult	7.97 ± 0.63 cm	Carnivore	Asia	Yes	Vietnam	Melkon Delta	10.0547	105.6			Muscle		Presumed captive		46		-22.5	1.6	-24.98	-18.21	6.77	3.5	0.5	2.05	5.26	3.21
Dittrich et al., 2017	Amphibian	Hoplobatrachus rugulosus	Adult	8.11 ± 0.56 cm	Carnivore	Asia	Yes	Vietnam	Melkon Delta	10.0547	105.6			Muscle		Presumed captive		34		-24.1	1.3	-27.68	-22.21	5.47	3.6	0.6	1.88	4.52	2.64
Dittrich et al., 2017	Amphibian	Fejervarya cancrivora	Adult	8.64 ± 0.43 cm	Carnivore	Asia	Yes	Indonesia		-1.002	114.076			Bone	Femoral	Presumed wild		32		-13.9	1.6	-16	-10.24	5.76					0						24.4	2	18.44	27.35								C and O (bone): < 0.1	V-PDB; SMOW
Dittrich et al., 2017	Amphibian	Limnonectes macrodon	Adult	9.47 ± 0.65 cm	Carnivore	Asia	Yes	Indonesia		-1.002	114.076			Bone	Femoral	Presumed wild		13		-14.7	0.9	-15.84	-12.51	3.33					0						24.1	2.3	18.25	26.5
Dittrich et al., 2017	Amphibian	Hoplobatrachus rugulosus	Adult	7.97 ± 0.63 cm	Carnivore	Asia	Yes	Vietnam	Melkon Delta	10.0547	105.6			Bone	Femoral	Presumed captive		46		-15.6	0.5	-16.88	-14.62	2.26					0						20.8	1.1	17.95	23.35
Dittrich et al., 2017	Amphibian	Hoplobatrachus rugulosus	Adult	8.11 ± 0.56 cm	Carnivore	Asia	Yes	Vietnam	Melkon Delta	10.0547	105.6			Bone	Femoral	Presumed captive		34		-15.8	1.1	-18.45	-14.25	4.2					0						20.5	1.9	16.71	25.44
Drago et al., 2015	Mammal	Otaria flavescens	Adult		Carnivore	South America	Yes	Urugay	Isla de Lobos	-35.0267	-54.8834	Jan	2013	Blood	Serum	Wild		8	0	-15.3	0.2			0	19.9	0.5			0																Only for C	C: 0.20; N: 0.30	V-PDB; AIR		10.1002/rcm.7249
Drago et al., 2015	Mammal	Otaria flavescens	Adult		Carnivore	South America	Yes	Urugay	Isla de Lobos	-35.0267	-54.8834	Jan	2013	Blood	RBC	Wild		8	0	-16.1	0.4			0	19.2	0.5			0
Drago et al., 2015	Mammal	Otaria flavescens	Subadult		Carnivore	South America	Yes	Urugay	Isla de Lobos	-35.0267	-54.8834	Jan	2013	Blood	Serum	Wild		8	0	-16.2	0.4			0	21.6	0.5			0
Drago et al., 2015	Mammal	Otaria flavescens	Subadult		Carnivore	South America	Yes	Urugay	Isla de Lobos	-35.0267	-54.8834	Jan	2013	Blood	RBC	Wild		8	0	-16.1	0.3			0	19.8	0.5			0
Drago et al., 2015	Mammal	Otaria flavescens	Adult		Carnivore	Europe	Yes	Spain	Valencia	39.4699	-0.376288		2007	Blood	Serum	Captive		2	> 6	-18.6	0.1			0	14.7	0.3			0
Drago et al., 2015	Mammal	Otaria flavescens	Adult		Carnivore	Europe	Yes	Spain	Valencia	39.4699	-0.376288		2007	Blood	RBC	Captive		2	> 6	-19.4	0.1			0	14.2	0.1			0
Drago et al., 2015	Mammal	Otaria flavescens	Subadult		Carnivore	Europe	Yes	Spain	Valencia	39.4699	-0.376288		2007	Blood	Serum	Captive		2	0	-19	0.2			0	16.5	0			0
Drago et al., 2015	Mammal	Otaria flavescens	Subadult		Carnivore	Europe	Yes	Spain	Valencia	39.4699	-0.376288		2007	Blood	RBC	Captive		2	0	-19.4	0			0	15	0.2			0
Farabegoli et al., 2018	Fish	Dicentrarchus labrax			Carnivore	Europe	Yes	FAO zone 27, FAO zone 37.2.1 and FAO zone 37.1.2	North East Atlantic, North West Adriaticn Nort East Adriatic and Gulf of Lion			All year		Muscle		Wild		45	0	-17.38	6.33				15.18	0.52																					V-PDB; AIR		10.1021/acs.jafc.8b00505
Farabegoli et al., 2018	Fish	Dicentrarchus labrax			Carnivore	Europe	Yes	Italy	Porto Tolle			All year		Muscle		Captive	extensive	19	0	-18.22	3.16				13.2	1.03
Farabegoli et al., 2018	Fish	Dicentrarchus labrax			Carnivore	Europe	Yes	Italy	Porto Tolle and Follonica			All year		Muscle		Captive	semi-intensive	20	0	-20.87	0.92				9.9	0.48
Farabegoli et al., 2018	Fish	Dicentrarchus labrax			Carnivore	Europe	Yes	Croatia, Italy, Turkey and Greece	Pokostane, Monfacone, Lavagna, Golfo Aranci, Capo Passero, Castellammare; Bodrum, Izmir, Athens and Koropiu			All year		Muscle		Captive	intensive	85	0	-20.48	2.44				10.81	1.23
Fasolato et al., 2010	Fish	Dicentrarchus labrax			Carnivore	Western Mediterranean; Northeast Atlantic	Yes	FAO zone 37.1 and FAO zone 27		39.8827	6.35782	Spring	2008	Muscle		Wild		19	0	-15	1.6	-18.6	-11.2	7.4	15	2.9	11.5	18.6	7.1																Yes	C and N: <0.3	V-PDB; AIR	The year in this study refers to when the animals were purchased	10.1021/jf1015126
Fasolato et al., 2010	Fish	Dicentrarchus labrax			Carnivore	Europe	Yes	Italy and Greece		38.9796	19.1253	Spring	2008	Muscle		Captive		20	0	-18.1	0.9	-21.5	-14.7	6.8	12.5	1	9.8	16.8	7
Fernandez-Jover et al., 2020	Fish	Belone belone		45.38 ± 3.66 cm	Omnivore	Europe	No	Croatia	Island of Murter	43.8045	15.597	Nov-Jan	2012-2013	Muscle		Wild		10	0	-18.33	0.5	-19.11	-17.75	1.36	10.01	1.01	8.64	11.56	2.92																	C and N: 0.10	PDB; AIR		https://doi.org/10.1016/j.rsma.2020.101357
Fernandez-Jover et al., 2020	Fish	Belone belone		34.72 ± 2.14 cm	Omnivore	Europe	No	Croatia	Primosten	43.5864	15.9233	Nov-Jan	2012-2013	Muscle		Wild		12	0	-17.69	0.4	-18.51	-16.95	1.56	8.42	0.62	8.08	10.23	2.15
Fernandez-Jover et al., 2020	Fish	Belone belone		42.17 ± 8.91 cm	Omnivore	Europe	No	Croatia		45.0995	15.2002	Nov-Jan	2012-2013	Muscle		Captive		11	0	-18.96	0.52	-19.8	-18	1.8	9.41	0.64	7.72	10.02	2.3
Fernandez-Jover et al., 2020	Fish	Boops boops		17.82 ± 1.00 cm	Carnivore	Europe	No	Croatia	Island of Murter	43.8045	15.597	Nov-Jan	2012-2013	Muscle		Wild		12	0	-18.32	0.46	-19.06	-17.87	1.19	7.89	0.13	7.71	8.09	0.38
Fernandez-Jover et al., 2020	Fish	Boops boops		16.57 ± 0.97 cm	Carnivore	Europe	No	Croatia	Makarska	43.295	17.0203	Nov-Jan	2012-2013	Muscle		Wild		10	0	-19.36	0.33	-19.83	-18.66	1.17	8.13	0.25	7.83	8.65	0.82
Fernandez-Jover et al., 2020	Fish	Boops boops		22.31 ± 2.58 cm	Carnivore	Europe	No	Croatia		45.0995	15.2002	Nov-Jan	2012-2013	Muscle		Captive		12	0	-20.1	1.15	-22.72	-18.43	4.29	10.35	1.17	7.33	12.59	5.26
Germain and McCarthy, 2012	Mammal	Phoca vitulina	Subadult and adult		Carnivore	North America	No	United States	Tomales Bay, CA	38.1713	-122.913	May-Jun	2007	Blood	Serum	Wild		35	0	-16.2	0.7	-17.7	-15.1	2.6	16.9	0.6	15.92	18.3	2.38																	C and N: ± 0.1	V-PDB; AIR		10.1111/j.1748-7692.2011.00516.x
Germain and McCarthy, 2012	Mammal	Phoca vitulina	Subadult and adult		Carnivore	North America	No	United States	San Francisco Bay, CA	37.7749	-122.419	May-Jun	2007	Blood	Serum	Wild		17	0	-16.9	0.7	-17.8	-15.7	2.1	17.4	1.3	15.8	20.1	4.3
Germain and McCarthy, 2012	Mammal	Phoca vitulina	Subadult and adult		Carnivore	North America	No	United States	Channel Island, CA	33.9579	-120.003	May-Jun	2007	Blood	Serum	Wild		52	0	-16.5	0.4	-17.6	-15.7	1.9	17.9	1	16.11	20.89	4.78
Germain and McCarthy, 2012	Mammal	Phoca vitulina	Subadult and adult		Carnivore	North America	No	United States	Sausalito, CA	37.8591	-122.485	Apr-Jun	2007	Blood	Serum	Captive		12	> 1	-18	0.6	-19	-17	2	16.3	0.4	15.4	16.6	1.2
Gopi et al., 2019	Fish	Lates calcarifer		60-70 cm	Carnivore	Asia	Yes	Malaysia		4.21229	101.972			Muscle		Wild		5	0	-18.18	0.865			0	12.33	0.975			0																Yes		V-PDB; AIR	Lipids were not extracted, but the authors used the formula from Post et al. (2007) to mathematically correct for lipids if the C:N ratio was>3.5	https://doi.org/10.1016/j.aquaculture.2018.12.012
Gopi et al., 2019	Fish	Lates calcarifer		60-70 cm	Carnivore	Asia	Yes	Malaysia		4.21229	101.972			Muscle		Captive		5	0	-21.85	0.105			0	8.85	0.08			0																Yes
Gopi et al., 2019	Fish	Lates calcarifer		60-70 cm	Carnivore	Oceania	Yes	Australia	Queensland	-22.5752	144.085			Muscle		Wild		7	0	-19.77	0.09			0	11.47	0.105			0																Yes
Gopi et al., 2019	Fish	Lates calcarifer		60-70 cm	Carnivore	Oceania	Yes	Australia	Queensland	-22.5752	144.085			Muscle		Captive		7	0	-20.36	0.41			0	9.88	0.28			0																Yes
Gopi et al., 2019	Fish	Lates calcarifer		60-70 cm	Carnivore	Oceania	Yes	Australia	Northen Territory	-19.7618	133.556			Muscle		Wild		7	0	-20.28	0.72			0	10.97	0.33			0																Yes
Gopi et al., 2019	Fish	Lates calcarifer		60-70 cm	Carnivore	Oceania	Yes	Australia	Northen Territory	-19.7618	133.556			Muscle		Captive		7	0	-20.34	0.66			0	10.11	0.4			0																Yes
Hammershøj et al., 2004	Mammal	Mustela vison	Subadult		Carnivore	Europe	No	Denmark	Jutland	56.0441	8.82366			Claw		Wild		7	0	-19.92	1.88	-22.43	-17.48	4.95					0																		PDB		https://doi.org/10.1078/1616-5047-00145
Hammershøj et al., 2004	Mammal	Mustela vison	Subadult		Carnivore	Europe	No	Denmark	Jutland	56.0441	8.82366			Teeth		Wild		7	0	-18.74	1.91	-21.84	-17.15	4.69					0
Hammershøj et al., 2004	Mammal	Mustela vison	Subadult		Carnivore	Europe	No	Denmark	Jutland	56.0441	8.82366			Claw		Captive		6	0	-19.15	0.51	-19.8	-18.42	1.38					0
Hammershøj et al., 2004	Mammal	Mustela vison	Subadult		Carnivore	Europe	No	Denmark	Jutland	56.0441	8.82366			Teeth		Captive		6	0	-17.74	0.53	-18.28	-17.11	1.17					0
Hammershøj et al., 2005	Mammal	Mustela vison	Subadult and adult		Carnivore	Europe	No	Denmark	Jutland and Bornholm	55.5038	11.879	Sep-Mar	1998-2000	Teeth		Presumed wild		47	0	-21.3	0.8	-23.22	-19.41	3.81					0																		PDB		https://doi.org/10.1078/1616-5047-00145
Hammershøj et al., 2005	Mammal	Mustela vison	Subadult and adult		Carnivore	Europe	No	Denmark	Jutland and Bornholm	55.5038	11.879	Sep-Mar	1998-2000	Claw		Presumed wild		45	0	-22.9	1.3	-25.76	-19.18	6.58					0
Hammershøj et al., 2005	Mammal	Mustela vison	Subadult and adult		Carnivore	Europe	No	Denmark	Jutland and Bornholm	55.5038	11.879	Sep-Mar	1998-2000	Teeth		Presumed captive	Earlier escaped	67	> 2	-17.4	0.8	-18.8	-15.34	3.46					0
Hammershøj et al., 2005	Mammal	Mustela vison	Subadult and adult		Carnivore	Europe	No	Denmark	Jutland and Bornholm	55.5038	11.879	Sep-Mar	1998-2000	Claw		Presumed wild	Earlier escaped	67	> 2	-22.8	0.9	-26.84	-16.53	10.31					0
Hammershøj et al., 2005	Mammal	Mustela vison	Subadult and adult		Carnivore	Europe	No	Denmark	Jutland and Bornholm	55.5038	11.879	Sep-Mar	1998-2000	Teeth		Presumed captive	Newly escaped	101	< 2	-17.3	0.9	-18.91	-12.79	6.12					0
Hammershøj et al., 2005	Mammal	Mustela vison	Subadult and adult		Carnivore	Europe	No	Denmark	Jutland and Bornholm	55.5038	11.879	Sep-Mar	1998-2000	Claw		Presumed captive	Newly escaped	101	< 2	-19	0.8	-20.34	-16.47	3.87					0
Hill et al., 2020	Reptile	Trachemys scripta	Adult		Omnivore	Oceania	No	Australia	Brisbane, Sydney, Melbourne and Adelaide	-32.4177	148.484			Carapace		Presumed wild		4		-23.83	3.13	-27.26	-20.09	7.17	7.95	1.26	6.44	9.22	2.78																		V-PDB; Air		https://doi.org/10.3897/neobiota.59.53671
Hill et al., 2020	Reptile	Trachemys scripta	Adult		Omnivore	Oceania	No	Australia	Brisbane, Sydney, Melbourne and Adelaide	-32.4177	148.484			Carapace		Presumed captive		6		-20.39	1.58	-22.24	-18.33	3.91	11.8	1.47	10.13	13.62	3.49
Hutchinson and Roberts, 2020	Mammal	Panthera leo			Carnivore	Africa	Yes	South Africa	Limpopo, KwaZulu-Natal, Eastern Cape and Weastern Cape	-28.2578	27.2299			Hair		Wild	All sites	53	0	-11.69	2.04	-17.88	-9.28	8.6	11.35	1.29	6.64	14.98	8.34																Yes	C: ± 0.07 N: ± 0.09	V-PDB; Air		https://doi.org/10.1007/s10531-020-01972-0
Hutchinson and Roberts, 2020	Mammal	Panthera leo			Carnivore	Africa	Yes	South Africa	Limpopo	-23.4013	29.4179	Jan-May	2018	Hair		Wild		5	0	-10.01	0.62	-10.52	-9.28	1.24	10.92	0.16	10.73	11.13	0.4																Yes
Hutchinson and Roberts, 2020	Mammal	Panthera leo			Carnivore	Africa	Yes	South Africa	KwaZulu-Natal	-28.5114	30.8902			Hair		Wild		36	0	-12.13	1.85	-17.88	-9.59	8.29	11.51	0.9	10.13	14.42	4.29																Yes
Hutchinson and Roberts, 2020	Mammal	Panthera leo			Carnivore	Africa	Yes	South Africa	Eastern Cape	-32.0262	26.7473	Jan-May	2018	Hair		Wild		4	0	-12.54	0.18	-12.69	-12.29	0.4	12.73	0.07	12.67	12.81	0.14																Yes
Hutchinson and Roberts, 2020	Mammal	Panthera leo			Carnivore	Africa	Yes	South Africa	Weastern Cape	-33.1465	22.2576	Jan-May	2018	Hair		Wild		1	0	-16.66	NA	NA	NA	NA	14.98	NA	NA	NA	NA																Yes
Hutchinson and Roberts, 2020	Mammal	Panthera leo			Carnivore	Africa	Yes	South Africa		-30.5595	22.9375			Hair		Captive		11	0	-12.59	1.53	-14.52	-10.45	4.07	10.16	1.24	7.92	11.84	3.92																Yes
Hutchinson and Roberts, 2020	Mammal	Panthera leo			Carnivore	Africa	Yes	Kenya		-0.023559	37.9062		1902-1903	Hair		Wild		4	0	-8.9	2.1	-10.02	-5.57	4.45	10.08	2.67	6.64	12.22	5.58																Yes	C: ± 0.14 N: ± 0.003
Jenkins et al., 2020	Bird	Fratercula arctica	Adult		Carnivore	North America	No	Canada	James Island and northeast coast of Newfoundland	49.5208	-55.5284	Aug	2017	Blood	RCB	Wild		16	0	-20.21	0.24			0	13.21	0.26			0																No		V-PDB; Air		10.1086/709460
Jenkins et al., 2020	Bird	Fratercula arctica	Adult		Carnivore	North America	No	Canada	James Island and northeast coast of Newfoundland	49.5208	-55.5284	Aug	2017	Blood	Plasma	Wild		16	0	-21.95	0.81			0	11.68	0.79			0																Yes
Jenkins et al., 2020	Bird	Uria aalge	Adult		Carnivore	North America	No	Canada	James Island and northeast coast of Newfoundland	46.1676	-60.8452	Aug	2017	Blood	RCB	Wild		20	0	-19.72	0.15			0	14.78	0.4			0																No
Jenkins et al., 2020	Bird	Uria aalge	Adult		Carnivore	North America	No	Canada	James Island and northeast coast of Newfoundland	46.1676	-60.8452	Aug	2017	Blood	Plasma	Wild		18	0	-21.48	0.45			0	13.35	0.36			0																Yes
Jenkins et al., 2020	Bird	Fratercula arctica	Adult		Carnivore	North America	No	Canada	Montreal Biodome, Montreal	45.5597	-73.5497	Dez-Mar	2017-2018	Blood	RCB	Captive		20	0	-18.27	0.28	-18.94	-17.97	0.97	15.18	0.23	14.78	15.66	0.88																No
Jenkins et al., 2020	Bird	Fratercula arctica	Adult		Carnivore	North America	No	Canada	Montreal Biodome, Montreal	45.5597	-73.5497	Dez-Mar	2017-2018	Blood	Plasma	Captive		20	0	-19.49	1	-22.51	-18.71	3.8	14.06	0.94	10.97	14.85	3.88																Yes
Jenkins et al., 2020	Bird	Uria aalge	Adult		Carnivore	North America	No	Canada	Montreal Biodome, Montreal	45.5597	-73.5497	Dez-Mar	2017-2018	Blood	RCB	Captive		20	0	-18.79	0.18	-19.14	-18.4	0.74	15.38	0.16	15.025	15.64	0.615																No
Jenkins et al., 2020	Bird	Uria aalge	Adult		Carnivore	North America	No	Canada	Montreal Biodome, Montreal	45.5597	-73.5497	Dez-Mar	2017-2018	Blood	Plasma	Captive		20	0	-20.17	0.57	-21.9	-19.47	2.43	14.55	0.7	12.43	15.21	2.78																Yes
Jiguet et al., 2019	Bird	Emberiza hortulana			Herbivore	Europe	No	France		46.2276	2.21375	Aug-Sep	2012-2015	Feather	Tail	Wild		40	0										0	-85.73	15.32	-116.24	-57.78												Yes	H: <2	VSMOW-SLAP		http://dx.doi.org/10.1016/j.forsciint.2019.109884
Jiguet et al., 2019	Bird	Emberiza hortulana			Herbivore	Europe	No	France	Landes	43.9412	-0.753281	Autumn	2012-2015	Feather	Tail or wing	Captive		34	1 molt										0	-114.1	8.5	-128.37	-96.11												Yes
Kays and Feranec, 2011	Mammal	Canis latrans			Carnivore	North America	Yes	United States	New York	40.7128	-74.006			Bone	Collagen	Wild	Natural area	14	0	-25.5	0.9	-27.5	-24.6	2.9	5.31	0.82	4.1	7	2.9																Yes		V-PDB; Air		http://dx.doi.org/10.1656/045.018.0301
Kays and Feranec, 2011	Mammal	Canis latrans			Carnivore	North America	Yes	United States	New Hampshire	43.1893	-71.5769			Bone	Collagen	Wild	Natural area	5	0	-27.52	1.56	-30.2	-26.1	4.1	3.52	1.62	0.9	5	4.1																Yes
Kays and Feranec, 2011	Mammal	Canis lupus			Carnivore	North America	Yes	Canada	Ontario	51.2538	-85.3232			Bone	Collagen	Wild	Natural area	5	0	-26.34	0.49	-26.8	-25.7	1.1	4.12	0.63	3.2	4.8	1.6																Yes
Kays and Feranec, 2011	Mammal	Canis latrans			Carnivore	North America	Yes	United States	Massachusetts	42.4072	-71.3824			Bone	Collagen	Wild	Urban area	8	0	-22.5	1.52	-24.9	-20.9	4	6.11	1.15	4.5	7.4	2.9																Yes
Kays and Feranec, 2011	Mammal	Canis latrans			Carnivore	North America	Yes	United States	New Hampshire	43.1893	-71.5769			Bone	Collagen	Captive		6		-20.6	1.1	-21.6	-18.9	2.7	6.5	1.1	5.4	8.5	3.1																Yes
Kays and Feranec, 2011	Mammal	Canis lupus			Carnivore	North America	Yes	United States	Northeastern	42.0306	-73.5634		1984-2008	Bone	Collagen	Presumed wild		3		-25.83	1.33	-27.3	-24.7	2.6	4.5	2.35	2	6.6	4.6																Yes
Kays and Feranec, 2011	Mammal	Canis lupus			Carnivore	North America	Yes	United States	Northeastern	42.0306	-73.5634		1984-2008	Hair		Presumed wild		4		-24.69	0.67	-25.6	-24.1	1.5	4.31	1.93	2	6.7	4.7																Yes
Kays and Feranec, 2011	Mammal	Canis lupus			Carnivore	North America	Yes	United States	Northeastern	42.0306	-73.5634		1984-2008	Bone	Collagen	Presumed captive		3		-18.97	1.53	-20.7	-17.8	2.9	4.97	1.78	3.7	7	3.3																Yes
Kays and Feranec, 2011	Mammal	Canis lupus			Carnivore	North America	Yes	United States	Northeastern	42.0306	-73.5634		1984-2008	Hair		Presumed captive		4		-18.47	1.32	-19.8	-16.9	2.9	4.62	1.26	3.1	6.1	3																Yes
Kelly et al., 2008	Bird	Carduelis carduelis		7.9 ± 0.08 cm	Herbivore	Europe	Yes	United Kingdom		55.378	-3.43597	Aug	2005	Feather	Primary	Presumed wild	C. c. britannica	7						0					0	-101.5	6.3	-107.79	-95.04														VSMOW	The "size range" refers to the wing size	https://doi.org/10.1016/j.scijus.2007.09.012
Kelly et al., 2008	Bird	Carduelis carduelis		8.6 ± 0.06 cm	Herbivore	Asia	Yes	Russia	Siberia	61.0137	99.1966	Aug	2005	Feather	Primary	Presumed wild	C. c. major	7						0					0	-126.9	6.2	-133.1	-120.71
Kelly et al., 2008	Bird	Serinus canaria			Herbivore	Europe	Yes	England	London	51.5072	-0.127586			Feather	Primary	Captive		4	0					0					0	-107.6	1.5	-109.03	-106.02
Liu et al., 2020	Fish	Cyprinus carpio; Ctenopharyngodon idella; Hypophthalmichthys molitrix; Mylopharyngodon piceus		0.10 - 0.50 kg	Omnivore	Asia	No	China	Hunan	28.1142	112.983	Oct-Nov	2017-2018	Muscle		Wild		30	0	-27.5	0.5	-29.13	-26.76	2.37	4.2	0.5	3.53	5.03	1.5																Yes	C and N: ± 0.2	V-PDB; Air		https://doi.org/10.1016/j.foodchem.2020.127115
Liu et al., 2020	Fish	Cyprinus carpio; Ctenopharyngodon idella; Hypophthalmichthys molitrix; Mylopharyngodon piceus		0.35 - 0.60 kg	Omnivore	Asia	No	China	Hunan	28.1142	112.983	Oct-Nov	2017-2018	Muscle		Captive	Lake-farmed	30	0	-27.2	0.7	-28.85	-26.59	2.26	4.6	0.7	4.01	5.85	1.84																Yes
Liu et al., 2020	Fish	Cyprinus carpio; Ctenopharyngodon idella; Hypophthalmichthys molitrix; Mylopharyngodon piceus		0.50 - 0.60 kg	Omnivore	Asia	No	China	Hunan	28.1142	112.983	Oct-Nov	2017-2018	Muscle		Captive	Pond-farmed	30	0	-27.1	0.6	-28.76	-25.48	3.28	4.9	0.6	3.92	6.3	2.38																Yes
Liu et al., 2020	Fish	Cyprinus carpio; Ctenopharyngodon idella; Hypophthalmichthys molitrix; Mylopharyngodon piceus	Subadult	0.10 - 050 kg	Omnivore	Asia	No	China	Hunan	28.1142	112.983	Oct-Nov	2017-2018	Scale	Collagen	Wild		30	0	-27.5	0.5	-28.3	-26.57	1.73	4.5	0.4	3.75	5.3	1.55																No
Liu et al., 2020	Fish	Cyprinus carpio; Ctenopharyngodon idella; Hypophthalmichthys molitrix; Mylopharyngodon piceus	Subadult	0.35 - 0.60 kg	Omnivore	Asia	No	China	Hunan	28.1142	112.983	Oct-Nov	2017-2018	Scale	Collagen	Captive	Lake-farmed	30	0	-26.7	0.3	-27.64	-25.6	2.04	5.1	0.9	4.62	6.4	1.78																No
Liu et al., 2020	Fish	Cyprinus carpio; Ctenopharyngodon idella; Hypophthalmichthys molitrix; Mylopharyngodon piceus	Subadult	0.50 - 0.60 kg	Omnivore	Asia	No	China	Hunan	28.1142	112.983	Oct-Nov	2017-2018	Scale	Collagen	Captive	Pond-farmed	30	0	-26.1	0.9	-27.28	-24.67	2.61	5.4	0.7	4.5	6.5	2																No
Martinez, 2015	Reptile	Bothrops atrox	Subadult and adult	2.29 ± 4.16 kg	Carnivore	South America	No	Brazil	Santarém	-2.44069	-54.7136		2013-2014	Blood		Wild	Forest	7	0	-23.95	1.34	-25.17	-21.4	3.77	13.34	2.83	10.57	18.91	8.34																Yes	C: 0.3 N: 0.5	PDB; Air		https://www.teses.usp.br/teses/disponiveis/64/64135/tde-23032016-152758/publico/MelissaGasteMartinez_Revisada.pdf
Martinez, 2015	Reptile	Bothrops atrox	Subadult and adult	6.70 ± 6.19 kg	Carnivore	South America	No	Brazil	Santarém	-2.44069	-54.7136		2013	Blood		Wild	Pasture	18	0	-23.37	1.4	-25.92	-20.91	5.01	11.92	0.91	10.73	14.51	3.78																Yes
Martinez, 2015	Reptile	Bothrops atrox	Subadult and adult	9.16 ± 0.84 kg	Carnivore	South America	No	Brazil	Santarém	-2.44069	-54.7136		2012-2014	Blood		Wild	Savanna	3	0	-23.07	1.8	-25.11	-21.69	3.42	10.3	2.79	8.3	13.49	5.19																Yes
Martinez, 2015	Reptile	Bothrops atrox	Subadult and adult	6.94 ± 7.31 kg	Carnivore	South America	No	Brazil	Santarém	-2.44069	-54.7136		2013	Blood		Captive		4	0	-23.1	2.09	-24.83	-20.09	4.74	11.07	3.45	6.78	15.06	8.28																Yes
Martinez, 2015	Reptile	Bothrops atrox	Subadult and adult	0.67 ± 0.19 kg	Carnivore	South America	No	Brazil	Santarém	-2.44069	-54.7136		2011-2014	Scale		Wild	Forest	14	0	-24.23	0.82	-26.13	-22.94	3.19	15.12	1.99	12.08	18.74	6.66																Yes
Martinez, 2015	Reptile	Bothrops atrox	Subadult and adult	0.80 ± 0.23 kg	Carnivore	South America	No	Brazil	Santarém	-2.44069	-54.7136		2013	Scale		Wild	Pasture	18	0	-23.04	1.59	-24.74	-19.83	4.91	12.36	1.22	9.86	15.2	5.34																Yes
Martinez, 2015	Reptile	Bothrops atrox	Subadult and adult	0.81 ± 0.19 kg	Carnivore	South America	No	Brazil	Santarém	-2.44069	-54.7136		2012-2013	Scale		Wild	Savanna	5	0	-23.61	2.12	-26.07	-20.86	5.21	9.64	1.92	7.11	12.5	5.39																Yes
Martinez, 2015	Reptile	Bothrops atrox	Subadult	0.43 ± 0.21 kg	Carnivore	South America	No	Brazil	Santarém	-2.44069	-54.7136		2013	Scale		Captive		3	0	-21.58	0.39	-22	-21.23	0.77	10.1	0.66	9.63	10.85	1.22																Yes
Molkentin et al., 2007	Fish	Salmo salar			Carnivore	Europe	Yes	Ireland	South	51.6157	-8.82755		2002	Muscle		Captive	Conventionally farmed	20	0	-21.9	0.32	-22.55	-21.51	1.04	11.68	0.17	11.43	12.09	0.66						17.56	1.67										C: < 0.05; N: < 0.05; O: < 0.08	V-PDB; Air; VSMOW		10.1007/s00217-006-0314-0
Molkentin et al., 2007	Fish	Salmo salar			Carnivore	Europe	Yes	Norway	South	58.1515	7.41138		2003	Muscle		Captive	Conventionally farmed	10	0	-18.83	0.46	-19.97	-18.18	1.79	10.06	0.25	9.67	10.47	0.8
Molkentin et al., 2007	Fish	Salmo salar			Carnivore	Europe	Yes	Norway	North	65.4256	12.1236		2003	Muscle		Captive	Conventionally farmed	10	0	-22.29	0.25	-22.68	-21.96	0.72	9.27	0.09	9.13	9.4	0.27
Molkentin et al., 2007	Fish	Salmo salar			Carnivore	Europe	Yes	Ireland	North	54.185	-9.09563		2003	Muscle		Captive	Conventionally farmed	10	0	-19.7	0.26	-20.21	-19.39	0.82	13.61	0.18	13.27	13.86	0.59
Molkentin et al., 2007	Fish	Salmo salar			Carnivore	Europe	Yes	Ireland	West	52.9898	-9.40666		2002	Muscle		Captive	Organically farmed	20	0	-19.9	0.36	-20.45	-19.07	1.38	13.78	0.15	13.44	14.04	0.6						17.07	1.83
Molkentin et al., 2007	Fish	Salmo salar			Carnivore	Europe	Yes	Ireland	West	52.9898	-9.40666		2003	Muscle		Captive	Organically farmed	10	0	-20.23	0.58	-20.94	-19.08	1.86	13.01	0.29	12.61	13.54	0.93
Molkentin et al., 2007	Fish	Salmo salar			Carnivore	Europe	Yes	Ireland		53.4225	-8.22535		2002	Muscle		Wild		10	0	-19.84	0.46	-20.58	-19.32	1.26	10.18	0.48	9.2	10.59	1.39
Molkentin et al., 2007	Fish	Salmo salar			Carnivore	Europe	Yes	Ireland		53.4225	-8.22535		2003	Muscle		Wild		10	0	-19.7	0.42	-20.47	-19.03	1.44	10.28	0.44	9.18	10.83	1.65
Molkentin et al., 2015	Fish	Oncorhynchus nerka; Oncorhynchus kisutch			Carnivore	North America	Yes	Alaska	Pacific Ocean	59.6979	-162.85		2010-2012	Muscle		Wild		21	0	-20.37	0.37	-21.08	-19.83	1.25	11.04	0.48	10.43	12.55	2.12																	C and N: <0.05	V-PDB; Air	The year in this study refers to when the animals were purchased	http://dx.doi.org/10.1016/j.foodcont.2015.01.003
Molkentin et al., 2015	Fish	Salmo salar			Carnivore	Europe	Yes	Ireland, Scotland and Norway		58.2132	1.45989		2010-2012	Muscle		Captive	Conventionally farmed	20	0	-21.98	0.55	-22.64	-20.22	2.42	8.92	0.57	7.93	9.8	1.87
Molkentin et al., 2015	Fish	Salmo salar			Carnivore	Europe	Yes	Ireland, Scotland and Norway		58.2132	1.45989		2010-2012	Muscle		Captive	Organically farmed	16	0	-19.68	0.62	-20.45	-18.78	1.67	11.61	0.83	10.62	13.45	2.83
Molkentin et al., 2015	Fish	Salmo trutta			Carnivore	Europe	Yes	Germany		51.1657	10.4515	Autumn	2010-2011	Muscle		Captive	Conventionally farmed	40	0	-22.03	0.62	-23.07	-21.12	1.95	11.59	0.87	10.02	12.83	2.81
Molkentin et al., 2015	Fish	Salmo trutta			Carnivore	Europe	Yes	Germany		51.1657	10.4515	Autumn	2010-2011	Muscle		Captive	Organically farmed	32	0	-20.46	0.72	-21.23	-18.92	2.31	9.29	0.5	8.5	10.28	1.78
Nabaes Jodar et al., 2020	Fish	Oncorhynchus mykiss			Carnivore	South America	No	Argentina	Alicurá reservoir, Limay River	-40.6494	-70.9174	Mar; May	2014	Muscle		Wild		23	0	-23.67	1.1	-18.48	-18.01	0.47	9.91	0.23	8.41	11.12	2.71																No		V-PDB; Air		https://doi.org/10.1007/s10750-019-04075-2(0123456789().,-volV() 0123458697().,-volV)
Nabaes Jodar et al., 2020	Fish	Oncorhynchus mykiss			Carnivore	South America	No	Argentina	Alicurá reservoir, Limay River	-40.6494	-70.9174			Muscle		Captive	Farm 1	5	0	-18.36	0.2	-19.81	-19.07	0.74	7.3	0.16	7.08	7.43	0.35																Yes
Nabaes Jodar et al., 2020	Fish	Oncorhynchus mykiss			Carnivore	South America	No	Argentina	Alicurá reservoir, Limay River	-40.6494	-70.9174			Muscle		Captive	Farm 2	5	0	-19.45	0.31	-19.89	-19.32	0.57	10.84	0.69	9.67	11.29	1.62																Yes
Nabaes Jodar et al., 2020	Fish	Oncorhynchus mykiss			Carnivore	South America	No	Argentina	Alicurá reservoir, Limay River	-40.6494	-70.9174			Muscle		Captive	Farm 3	5	0	-19.68	0.22	-24.91	-21.09	3.82	11.02	0.12	10.83	11.14	0.31																Yes
Natusch et al., 2017	Reptile	Python bivittatus			Carnivore	Asia	No	Vietnam	Cà Mau	9.15267	105.196	May - Sep	2014 - 2015	Skin	Posterior section	Wild		10	0	-23.4	1.1	-24.82	-21.23	3.59	8.16	0.73	7.11	9.43	2.32	-48.81	7.81																V-PDB; Air; VSMOW		http://dx.doi.org/10.1016/j.biocon.2017.02.042
Natusch et al., 2017	Reptile	Python bivittatus	Subadult		Carnivore	Asia	No	Vietnam	Ho Chi Minh	10.8231	106.63			Skin	Posterior section	Captive	Feeding experiment with rat	14	0	-23.5	0.14	-23.82	-23.31	0.51	7.38	0.19	6.98	7.62	0.64	-40.53	2.9
Natusch et al., 2017	Reptile	Python bivittatus	Subadult		Carnivore	Asia	No	Vietnam	Ho Chi Minh	10.8231	106.63			Skin	Posterior section	Captive	Feeding experiment with sausage	44	0	-21.11	0.95	-23.33	-19.76	3.57	6.78	0.23	6.32	7.26	0.94	-39.9967
Natusch et al., 2017	Reptile	Python reticulatus			Carnivore	Oceania	Yes	Indonesia	Palembang, Sumatra, Rantaupraoart Sumatra, Pangkalan Bun and Borneo	-2.06465	110.374			Skin	Posterior section	Wild		38	0	-23.17	0.86			0	9.63	1.17	6.98	11.74	4.76	-25.52	8.51	-38.23	-7.72
Natusch et al., 2017	Reptile	Python reticulatus			Carnivore	Asia	No	Vietnam	Cà Mau	9.15267	105.196	May - Sep	2014 - 2015	Skin	Posterior section	Wild		5	0	-23.97	0.8			0	8.55	0.87	7.52	9.85	2.33	-38.06	10.6	-54.13	-35.7
Natusch et al., 2017	Reptile	Python reticulatus			Carnivore	Asia	No	Vietnam	Ho Chi Minh	10.8231	106.63			Skin	Posterior section	Captive	Rat	6	0	-23.17	0.46			0	9.99	0.83	9.26	11.52	2.26	-25.82	4.93	-31.55	-19.46
Navarro, 2009	Mammal	Hydrochoerus hydrochaeris	Subadult and adult	50.21 ± 11.92 kg	Herbivore	South America	No	Brazil	São Paulo	-21.2922	-50.3428			Muscle		Wild	Natural area	3	0	-17.09	1.49	-18.63	-15.65	2.98	5.69	0.32	5.32	5.9	0.58																	C: 0.3; N: 0.5	PDB; Air		https://www.teses.usp.br/teses/disponiveis/91/91131/tde-07082009-144857/publico/Sandra_Navarro.pdf
Navarro, 2009	Mammal	Hydrochoerus hydrochaeris	Subadult and adult	50.21 ± 11.92 kg	Herbivore	South America	No	Brazil	São Paulo	-21.2922	-50.3428			Blood		Wild	Natural area	17	0	-16.78	1.74	-20.7	-13.8	6.9	5.51	0.34	4.9	6.1	1.2
Navarro, 2009	Mammal	Hydrochoerus hydrochaeris	Subadult and adult	50.21 ± 11.92 kg	Herbivore	South America	No	Brazil	São Paulo	-21.2922	-50.3428			Hair		Wild	Natural area	20	0	-15.125	1.78	-18.7	-12	6.7	5.6	0.29	5	6.1	1.1
Navarro, 2009	Mammal	Hydrochoerus hydrochaeris	Subadult and adult	50.21 ± 11.92 kg	Herbivore	South America	No	Brazil	São Paulo	-21.2922	-50.3428			Claw		Wild	Natural area	20	0	-15.13	1.54	-18.3	-12.1	6.2	5.575	0.3	5	6.1	1.1
Navarro, 2009	Mammal	Hydrochoerus hydrochaeris		42.83 ± 17.80 kg	Herbivore	South America	No	Brazil	Piracicaba	-22.7336	-47.6493			Muscle		Wild	Agricultural area	14	0	-12.16	0.65	-13.2	-10.7	2.5	8.08	0.73	6.9	9.3	2.4
Navarro, 2009	Mammal	Hydrochoerus hydrochaeris			Herbivore	South America	No	Brazil	Holambra	-22.6274	-47.0497			Muscle		Captive		9	0	-13.8	0.73	-14.9	-12.7	2.2	10.12	0.62	9.4	11.4	2
Navarro, 2009	Mammal	Hydrochoerus hydrochaeris			Herbivore	South America	No	Brazil	Holambra	-22.6274	-47.0497			Blood		Captive		9	0	-13.76	0.68	-14.1	-12.5	1.6	9.27	0.32	8.7	9.8	1.1
Navarro, 2009	Mammal	Hydrochoerus hydrochaeris			Herbivore	South America	No	Brazil	Holambra	-22.6274	-47.0497			Hair		Captive		10	0	-13.1	1.22	-14.6	-11.1	3.5	8.77	0.75	7.5	10	2.5
Navarro, 2009	Mammal	Hydrochoerus hydrochaeris			Herbivore	South America	No	Brazil	Holambra	-22.6274	-47.0497			Claw		Captive		10	0	-13.47	1.4	-15.3	-10.7	4.6	9.05	0.45	8.5	9.7	1.2
Navarro, 2009	Mammal	Hydrochoerus hydrochaeris			Herbivore	South America	No	Brazil	Três Rios	-22.1151	-43.2087			Muscle		Captive	Breeder 1	9	0	-18.16	0.85	-19.6	-16.9	2.7	5.17	0.55	4.7	6.2	1.5
Navarro, 2009	Mammal	Hydrochoerus hydrochaeris			Herbivore	South America	No	Brazil	Três Rios	-22.1151	-43.2087			Blood		Captive	Breeder 1	9	0	-18.2	0.68	-19.4	-17.1	2.3	4.68	0.72	4.1	5.1	1
Navarro, 2009	Mammal	Hydrochoerus hydrochaeris			Herbivore	South America	No	Brazil	Três Rios	-22.1151	-43.2087			Hair		Captive	Breeder 1	9	0	-15.67	0.91	-17.2	-14.7	2.5	4.92	1.55	3.9	9	5.1
Navarro, 2009	Mammal	Hydrochoerus hydrochaeris			Herbivore	South America	No	Brazil	Três Rios	-22.1151	-43.2087			Claw		Captive	Breeder 1	9	0	-16.14	1.68	-19.8	-14.5	5.3	5.17	1.37	4.5	8.8	4.3
Navarro, 2009	Mammal	Hydrochoerus hydrochaeris			Herbivore	South America	No	Brazil	Três Rios	-22.1151	-43.2087			Muscle		Captive	Breeder 2	11	0	-17.17	0.8	-18.1	-15.1	3	8.48	0.48	7.8	9.3	1.5
Navarro, 2009	Mammal	Hydrochoerus hydrochaeris			Herbivore	South America	No	Brazil	Três Rios	-22.1151	-43.2087			Blood		Captive	Breeder 2	11	0	-17.09	0.52	-17.6	-16.7	0.9	7.52	0.39	6.8	7.9	1.1
Navarro, 2009	Mammal	Hydrochoerus hydrochaeris			Herbivore	South America	No	Brazil	Três Rios	-22.1151	-43.2087			Hair		Captive	Breeder 2	11	0	-15.84	1.33	-17.7	-14.4	3.3	7.39	0.98	4.6	8.2	3.6
Navarro, 2009	Mammal	Hydrochoerus hydrochaeris			Herbivore	South America	No	Brazil	Três Rios	-22.1151	-43.2087			Claw		Captive	Breeder 2	11	0	-15.22	2.52	-21.3	-12.6	8.7	7.62	0.84	5.7	8.5	2.8
Pereira et al., 2019	Fish	Arapaima spp.			Carnivore	South America	No	Brazil	Lower Amazon	-2.4335	-57.609			Otolith		Wild		4	0	-25.8	2.27	-28.4	-22.9	5.5					0																				https://doi.org/10.5194/bg-16-1781-2019
Pereira et al., 2019	Fish	Arapaima spp.			Carnivore	South America	No	Brazil	Lower Amazon	-2.4335	-57.609			Otolith		Captive		3	0	-14.43	1.02	-15.6	-13.7	1.9					0
Pereira et al., 2019	Fish	Arapaima spp.			Carnivore	South America	No	Brazil	Central Amazon	-3.60404	-61.2314			Otolith		Wild		4	0	-18.4	2.15	-20	-15.4	4.6					0
Pereira et al., 2019	Fish	Arapaima spp.			Carnivore	South America	No	Brazil	Central Amazon	-3.60404	-61.2314			Otolith		Captive		5	0	-23.82	2.99	-26	-18.6	7.4					0
Pereira et al., 2019	Fish	Arapaima spp.			Carnivore	South America	No	Brazil	Solimões	-2.7346	-65.3592			Otolith		Wild		5	0	-25.2	0.31	-25.6	-24.8	0.8					0
Pereira et al., 2019	Fish	Arapaima spp.			Carnivore	South America	No	Brazil	Solimões	-2.7346	-65.3592			Otolith		Captive		3	0	-24.13	0.95	-25.1	-23.2	1.9					0
Pereira et al., 2019	Fish	Arapaima spp.			Carnivore	South America	No	Brazil	Madeira	-6.9314	-62.4912			Otolith		Wild		9	0	-25.59	1.73	-28.1	-23.7	4.4					0
Pereira et al., 2019	Fish	Arapaima spp.			Carnivore	South America	No	Brazil	Madeira	-6.9314	-62.4912			Otolith		Captive		5	0	-7.72	1.64	-8.7	-4.8	3.9					0
Rojas et al., 2007	Fish	Sparus aurata			Carnivore	Europe	Yes	Italy, France	Chioggia, Marseille	43.8021	7.58156	Sep-Jun	2004-2005	Muscle		Wild		10		-17.14	1.4	-19.1	-14.6	4.5	12	2.3	7.5	15.5	8																	C: ±0.20; N: ±0.15	V-PDB; Air		10.1002/rcm.2836
Rojas et al., 2007	Fish	Sparus aurata			Carnivore	Europe	Yes	Italy, Greece, Croatia and Turkey		41.4035	17.8725			Muscle		Captive		40		-21.97	0.75	-23.3	-20.5	2.8	13.22	1.77	11	16.3	5.3
Sant'Ana et al., 2010	Fish	Pseudoplatystoma fasciatum			Carnivore	South America	No	Brazil	Alta Floresta, MT	-9.86818	-56.0835	Sep	2006	Muscle		Wild	Dry season	10	0	-29.09	0.99	-31.03	-29.13	1.9	14	0.32	11.66	13.02	1.36																		V-PDB; Air		10.1016/j.foodchem.2010.02.016
Sant'Ana et al., 2010	Fish	Pseudoplatystoma fasciatum			Carnivore	South America	No	Brazil	Alta Floresta, MT	-9.86818	-56.0835	Sep	2006	Muscle		Captive	Dry season	10	0	-23.62	1.18	-25.14	-21.95	3.19	13.85	0.32	13.48	14.26	0.78
Sant'Ana et al., 2010	Fish	Pseudoplatystoma fasciatum			Carnivore	South America	No	Brazil	Alta Floresta, MT	-9.86818	-56.0835	Jan	2007	Muscle		Wild	Rainy season	10	0	-29.95	0.57	-30.62	-25.51	5.11	12.8	0.64	11.73	13.71	1.98
Sant'Ana et al., 2010	Fish	Pseudoplatystoma fasciatum			Carnivore	South America	No	Brazil	Alta Floresta, MT	-9.86818	-56.0835	Jan	2007	Muscle		Captive	Rainy season	10	0	-24.04	1.7	-25.12	-21.98	3.14	13.95	0.25	11.23	13.37	2.14
Schröder and Leaniz, 2011	Fish	Salmo salar	Subadult	10.74 ± 2.90	Carnivore	South America	No	Chile	Los Lagos Region	-42.5727	-73.958	Nov-Sep	2007-2008	Muscle	White	Wild		25		-31.93	5.83	-41.13	-22.36	18.77	10.32	2.83	5.19	15.46	10.27																		V-PDB; Air		10.1007/s10530-010-9802-z
Schröder and Leaniz, 2011	Fish	Salmo salar	Subadult	8.15 ± 2.35	Carnivore	South America	No	Chile	Island of Chiloé, Los Lagos Region	-42.1419	-73.4649			Muscle	White	Captive		24		-26.4	2.9	-30.98	-21.47	9.51	14.46	1.24	10.34	16.56	6.22
Schröder and Leaniz, 2011	Fish	Oncorhynchus mykiss	Subadult	16.78 ± 10.14	Carnivore	South America	No	Chile	Los Lagos Region	-42.5727	-73.958	Nov-Sep	2007-2008	Muscle	White	Wild		28		-32.65	5.14	-39.05	-19.57	19.48	10.54	1.64	8.91	15.73	6.82
Schröder and Leaniz, 2011	Fish	Oncorhynchus mykiss	Subadult	10.14 ± 1.02	Carnivore	South America	No	Chile	Island of Chiloé, Los Lagos Region	-43.1211	-73.7253			Muscle	White	Captive		25		-27.74	2.6	-33.16	-21.47	11.69	15.1	0.99	12.28	17.67	5.39
Sears et al., 2009	Bird	Cerorhinca monocerata	Subadult		Carnivore	North America	No	United States	Alaska	64.2009	-149.494	Jul	2007	Blood	RBC	Wild		15	0	-19.99	0.16			1.03	13.14	0.25			1.03																	C: ± 0.15; N: ± 0.20	V-PDB; Air		10.1007/s00442-008-1199-3
Sears et al., 2009	Bird	Cerorhinca monocerata	Adult		Carnivore	North America	No	United States	Alaska	64.2009	-149.494	Jul	2007	Blood	RBC	Wild		15	0	-19.64	0.24			1.03	13.38	0.33			1.03
Sears et al., 2009	Bird	Cerorhinca monocerata	Adult		Carnivore	North America	No	United States	Alaska	64.2009	-149.494	Jul	2007	Feather		Wild		13	0	-20.35	0.63			2.2	15.69	1.7			5.85
Sears et al., 2009	Bird	Cerorhinca monocerata	Subadult		Carnivore	North America	No	United States	Alaska	64.2009	-149.494	Jun-Aug	2006	Blood	RBC	Captive	7 - 56 days old	7	0	-17.05	0.38	-17.96	-16.83	1.13	14.02	0.24	13.61	14.46	0.85
Sears et al., 2009	Bird	Cerorhinca monocerata	Subadult		Carnivore	North America	No	United States	Alaska	64.2009	-149.494	Jun-Aug	2006	Feather		Captive	7 - 56 days old	7	0	-15.54	0.04			0	15.72	0.63			0
Sears et al., 2009	Bird	Cerorhinca monocerata	Subadult		Carnivore	North America	No	United States	Alaska	64.2009	-149.494	Jun-Aug	2006	Blood	RBC	Captive	6 months old	11	0	-16.8				0	14.56				0
Serrano et al., 2007	Fish	Sparus aurata			Carnivore	Europe	No	Spain	Castellón de la Plana	39.9463	-0.028504	Oct	2005	Muscle	red	Wild		6	0	-16.64	0.36			0	11.53	0.12			0																Yes	C: ±0.25; N: ±0.20	V-PDB; Air		10.1016/j.chemosphere.2007.04.034
Serrano et al., 2007	Fish	Sparus aurata			Carnivore	Europe	No	Spain	Castellón de la Plana	39.9463	-0.028504	Oct	2005	Muscle	White	Wild		6	0	-16.2	0.12			0	11.51	0.13			0
Serrano et al., 2007	Fish	Sparus aurata			Carnivore	Europe	No	Spain	Castellón de la Plana	39.9463	-0.028504	Oct	2005	Liver		Wild		6	0	-17.97	0.3			0	9.29	0.12			0
Serrano et al., 2007	Fish	Sparus aurata			Carnivore	Europe	No	Spain	Castellón de la Plana	39.9463	-0.028504	Oct	2005	Gill		Wild		6	0	-17.07	0.3			0	10.45	0.17			0
Serrano et al., 2007	Fish	Sparus aurata			Carnivore	Europe	No	Spain	Castellón de la Plana	39.9463	-0.028504	Oct	2005	Gonads		Wild		6	0	-17.31	0.12			0	8.83	0.12			0
Serrano et al., 2007	Fish	Sparus aurata			Carnivore	Europe	No	Spain	Castellón de la Plana	39.9463	-0.028504	Oct	2005	Muscle	Red	Captive		6	0	-19.62	0.3			0	13.45	0.12			0
Serrano et al., 2007	Fish	Sparus aurata			Carnivore	Europe	No	Spain	Castellón de la Plana	39.9463	-0.028504	Oct	2005	Muscle	White	Captive		6	0	-19.16	0.12			0	12.8	0.13			0
Serrano et al., 2007	Fish	Sparus aurata			Carnivore	Europe	No	Spain	Castellón de la Plana	39.9463	-0.028504	Oct	2005	Liver		Captive		6	0	-21.5	0.15			0	10.55	0.12			0
Serrano et al., 2007	Fish	Sparus aurata			Carnivore	Europe	No	Spain	Castellón de la Plana	39.9463	-0.028504	Oct	2005	Gill		Captive		6	0	-20.04	0.41			0	10.18	0.11			0
Serrano et al., 2007	Fish	Sparus aurata			Carnivore	Europe	No	Spain	Castellón de la Plana	39.9463	-0.028504	Oct	2005	Gonads		Captive		6	0	-19.39	0.24			0	11.8	0.13			0
Serrano et al., 2008	Fish	Sparus aurata		0.61 ± 0.09 kg	Carnivore	Europe	No	Spain	Castellón de la Plana	39.9856	-0.049639	Jan, Mar, May, Oct, Dec	2005	Muscle	White	Wild		6	0	-15.92	0.26	-16.37	-15.31	1.06	11.98	0.51	10.97	12.95	1.98																Yes	C: ± 0,25; N: ± 0,20	V-PDB; Air		10.1016/j.scitotenv.2007.09.020
Serrano et al., 2008	Fish	Sparus aurata		0.61 ± 0.03 kg	Carnivore	Europe	No	Spain	Castellón de la Plana	39.9856	-0.049639	Jan, Mar, May, Oct, Dec	2005	Muscle	White	Captive		6	0	-19.18	0.6	-20.34	-18.17	2.17	13.8	0.65	12.77	14.71	1.94
Stoskopf et al., 2001	Reptile	Alligator mississippiensis	Subadult	2.000 cm	Carnivore	North America	No	United States	Florida	27.6648	-81.5159			Bone		Wild		3	0					0					0						21.09	1.36	18.36	23.1								O: ±0.06	SMOW		10.1016/S0306-4565(00)00041-3
Stoskopf et al., 2001	Reptile	Alligator mississippiensis	Subadult	2.000 cm	Carnivore	North America	No	United States		37.0902	-95.7129			Bone		Captive		3	0					0					0						19.19	0.74	16.95	20.87
Trembaczowski and Niezgoda, 2011	Fish	Salmo trutta		43.48 ± 5.93 cm	Carnivore	Europe	No	Poland	Por, Biala Lada, Wieprz, Bystrzyca and San rivers	50.7331	21.6718			Scale		Wild	River	77	0	-27.16	2.4	-31.31	-21.82	9.49					0											-7.2	3.78	-13.44	2.95			C and S: ±0.05	V-PDB; V-CDT		https://doi.org/10.1080/10256016.2011.572166
Trembaczowski and Niezgoda, 2011	Fish	Salmo trutta		57.75 ± 9.74 cm	Carnivore	Europe	No	Poland	Pomeranian	54.0003	18.279			Scale		Wild	Sea	5	0	-16.68	0.86	-17.67	-16.11	1.56					0											17.35	0.61	16.39	17.98
Trembaczowski and Niezgoda, 2011	Fish	Salmo trutta		7.2 ± 0.76 cm	Carnivore	Europe	No	Poland	Pomeranian	54.0003	18.279			Scale		Captive		35	0	-20.3	0.82	-21.37	-19.09	2.28					0											15.91	0.41	15.19	16.23
Trembaczowski and Niezgoda, 2011	Fish	Oncorhynchus mykiss		33.36 ± 2.89 cm	Carnivore	Europe	No	Poland	Wieprz and Bystrzyca rivers	50.7331	21.6718			Scale		Wild	River	3	0	-24.88	1.3	-25.64	-23.37	2.27					0											-2.24	2.41	-4.88	-0.17
Trembaczowski and Niezgoda, 2011	Fish	Oncorhynchus mykiss		32.18 ± 4.60 cm	Carnivore	Europe	No	Poland	Pomeranian	54.0003	18.279			Scale		Captive		11	0	-20.82	0.98	-22.53	-19.65	2.88					0											16.29	5.42	11.08	25.88
Trembaczowski, 2012	Fish	Salmo trutta	Adult		Carnivore	Europe	No	Poland		51.8206	19.0502			Muscle		presumed wild		2	0	-26.53	0.44	-26.84	-26.22	0.62					0											-2.12	5.87	-6.27	2.03			C and S: ±0.05	PDB; V-CDT		10.2478/v10002-011-0004-9
Trembaczowski, 2012	Fish	Salmo trutta	Adult		Carnivore	Europe	No	Poland		51.8206	19.0502			Scale		presumed wild		2	0	-22.79	0.78	-23.35	-22.24	1.11					0											-2.17	0.13	-2.27	-2.08
van Schigen et al., 2016	Reptile	Shinisaurus crocodilurus	Subadult and adult		Carnivore	Asia	No	Vietnam	Bac Giang and Quang Ninh	21.1802	106.385	Jun-Jul	2013	Scale	Tail	Wild		10	0	-24.6	0.72	-25.6	-23.5	2.1	5.9	0.66	4.5	6.6	2.1																	C and N: <0.1	V-PDB; Air	The authors consider it as a "semi-captive". Animals were not born in the nursery, but have been there for at least 3 years	http://dx.doi.org/10.1016/j.gecco.2016.03.004
van Schigen et al., 2016	Reptile	Shinisaurus crocodilurus	Subadult		Carnivore	Asia	No	Vietnam	Vinh Phuc	21.3609	105.547		2013	Scale	Tail	Captive	Born	8	0	-23.7	0.17	-23.9	-23.4	0.5	8.9	0.57	7.4	9.6	2.2
van Schigen et al., 2016	Reptile	Shinisaurus crocodilurus	Adult		Carnivore	Asia	No	Vietnam	Vinh Phuc	21.3609	105.547		2013	Scale	Tail	Captive	Transfered	3	> 36	-23.8	1.62	-24.8	-21.9	2.9	8.2	1.19	8	9.7	1.7
Vasconi et al., 2019	Fish	Anguilla anguilla	Adult	51.4 ± 2.70 cm	Carnivore	Europe	Yes	Italy	Bonello	44.8297	11.4502	winter	2014-2015	Muscle		Wild	Sea (males and females)	6	0	-23.13	1.57	-24.37	-20.07	4.3	15.28	1.1	13.62	16.11	2.49																Yes	C: ±0.05; N: ±0.08	V-PDB; Air		https://doi.org/10.1016/j.foodcont.2019.03.004
Vasconi et al., 2019	Fish	Anguilla anguilla	Adult	46.1 ± 2.9 cm	Carnivore	Europe	Yes	Italy	Sacca of Scardovari	44.8832	12.3991	winter	2014-2015	Muscle		Wild	Lagoon (males)	5	0	-18.12	0.34	-18.71	-17.91	0.8	11.68	1.15	10.48	13.55	3.07																Yes
Vasconi et al., 2019	Fish	Anguilla anguilla	Adult	61.3 ± 5.0 cm	Carnivore	Europe	Yes	Italy		41.8719	12.5674	winter	2014-2015	Muscle		Captive	Pond (extensive farming females)	7	4-7	-18.14	0.5	-18.79	-17.19	1.6	14.65	0.1	12.57	15.32	2.75																Yes
Vasconi et al., 2019	Fish	Anguilla anguilla	Adult	69.1 ± 5.0 cm	Carnivore	Europe	Yes	Italy		41.8719	12.5674	winter	2014-2015	Muscle		Captive	Pond (extensive farming males)	7	8-12	-18.5	0.48	-19.27	-18.08	1.19	14.42	0.4	13.92	14.97	1.05																Yes
Vasconi et al., 2019	Fish	Anguilla anguilla	Adult	43.3 ± 3.1 cm	Carnivore	Europe	Yes	Netherlands		52.129	52.129	winter	2014-2015	Muscle		Captive	RAS (intensive farming females)	3	4-7	-20.38	0.48	-20.7	-19.83	0.87	12.62	0.21	12.49	12.87	0.38																Yes
Vasconi et al., 2019	Fish	Anguilla anguilla	Adult	68.0 ±3.5 cm	Carnivore	Europe	Yes	Netherlands		52.129	52.129	winter	2014-2015	Muscle		Captive	RAS (intensive farming males)	3	8-12	-18.27	0.25	-18.55	-18.08	0.47	14.46	0.17	14.33	14.66	0.33																Yes
Vasconi et al., 2019	Fish	Anguilla anguilla	Adult	43.2 ± 3.0 cm	Carnivore	Europe	Yes	Denmark		56.2639	9.50178	winter	2014-2015	Muscle		Captive	RAS (intensive farming females)	3	4-7	-20.27	0.22	-20.47	-20.03	0.44	12.9	0.17	12.78	13.09	0.31																Yes
Vasconi et al., 2019	Fish	Anguilla anguilla	Adult	66.7 ± 1.5 cm	Carnivore	Europe	Yes	Denmark		56.2639	9.50178	winter	2014-2015	Muscle		Captive	RAS (intensive farming males)	3	8-12	-18.65	0.4	-18.94	-18.19	0.75	14.22	0.07	14.16	14.3	0.14																Yes
Vizzini et al., 2010	Fish	Thunnus thynnus		126.26 ± 11.56 cm; 28.06 ± 8.41 kg	Carnivore	Europe	No	Italy	Favignana	37.928	12.2949	May	2005	Muscle		Wild		9	0	-17.4	0.5			0	9	0.2			0																	C and N: 0.20			10.1016/j.chemosphere.2009.12.041
Vizzini et al., 2010	Fish	Thunnus thynnus		126.26 ± 11.56 cm; 28.06 ± 8.41 kg	Carnivore	Europe	No	Italy	Favignana	37.928	12.2949	May	2005	Liver		Wild		9	0	-19.69	0.2			0	8.79	0.4			0
Vizzini et al., 2010	Fish	Thunnus thynnus		138.17 ± 9.37 cm 35.67 ± 7.87 kg	Carnivore	Europe	No	Italy	Gulf of Castellammare	38.0276	12.9193	Nov	2005	Muscle		Captive		6	0	-17.19	0.5			0	11.9	0.6			0
Vizzini et al., 2010	Fish	Thunnus thynnus		138.17 ± 9.37 cm 35.67 ± 7.87 kg	Carnivore	Europe	No	Italy	Gulf of Castellammare	38.0276	12.9193	Nov	2005	Liver		Captive		6	0	-19.59	0.5			0	10.3	0.59			0
Wang et al., 2018	Fish	Salmo salar	Adult (pre spawing)		Carnivore	Europe	Yes	Norway	Veafjorden	60.572	5.72646	Jul	2012	Muscle		Wild	Atlantic	10	0	-19.79	0.34	-20.04	-19.03	1.01	12.19	0.54	11.2	12.8	1.6																No	C and N: ± 0.2 C	V-PDB; Air		https://doi.org/10.1016/j.foodchem.2018.02.095
Wang et al., 2018	Fish	Oncorhynchus gorbuscha	Adult (pre spawing)		Carnivore	North America	Yes	United States	Valdez, Alaska	61.1309	-146.35	Jul	2016	Muscle		Wild	Pacific	4	0	-21.87	0.27	-22.2	-21.6	0.6	11.7	0.55	11.3	12.5	1.2																No
Wang et al., 2018	Fish	Oncorhynchus nerka	Adult (pre spawing)		Carnivore	North America	Yes	United States	Copper River, Alaska	62.3838	-144.403	Jul	2016	Muscle		Wild	Pacific	5	0	-21.88	0.16	-22	-21.6	0.4	10.86	0.34	10.6	11.4	0.8																No
Wang et al., 2018	Fish	Salmo salar	Adult		Carnivore	Europe	Yes	Norway		60.472	8.46895	Oct	2015-2016	Muscle		Captive	Organically farmed	8	0	-20.93	0.35	-21.4	-20.4	1	11.93	0.51	11.3	12.5	1.2																No
Wang et al., 2018	Fish	Salmo salar	Adult		Carnivore	Europe	Yes	Norway		60.472	8.46895		2016	Muscle		Captive	Conventionally farmed	6	0	-24.23	0.28	-24.7	-23.9	0.8	6.42	0.24	6	6.9	0.9																No
Wang et al., 2018	Fish	Salmo salar	Adult		Carnivore	Europe	Yes	Norway	Faroe Island	61.8916	-6.90012		2015	Muscle		Captive	Conventionally farmed	2	0	-23.35	0.21	-23.5	-23.2	0.3	8.75	0.07	8.7	8.8	0.1																No
Wang et al., 2018	Fish	Salmo salar	Adult		Carnivore	Europe	Yes	Ireland		53.4225	-8.22535	Nov	2016	Muscle		Captive	Organically farmed	12	0	-20.1	0.51	-20.8	-19.4	1.4	11.7	0.69	10.7	12.6	1.9																No
Wang et al., 2018	Fish	Salmo salar	Adult		Carnivore	Europe	Yes	Ireland	Galway	53.2707	-9.05679		2015	Muscle		Captive	Control of feeding experiments	6	0	-20.22	0.1	-20.3	-20.1	0.2	11.31	0.25	10.9	11.6	0.7																No
Wang et al., 2018	Fish	Salmo salar	Adult		Carnivore	Europe	Yes	Ireland	Galway	53.2707	-9.05679		2015	Muscle		Captive	Feeding experiment with Palmaria parmata	3	3.4	-20.17	0.25	-20.4	-19.9	0.5	11.13	0.4	10.7	11.5	0.8																No
Wang et al., 2018	Fish	Salmo salar	Adult		Carnivore	Europe	Yes	Ireland	Galway	53.2707	-9.05679		2015	Muscle		Captive	Feeding experiment with Ulva rigida	3	4.75	-20.13	0.06	-20.2	-20.1	0.1	11.23	0.25	11	11.5	0.5																No
Wang et al., 2018	Fish	Salmo salar	Adult		Carnivore	Europe	Yes	Norway	Dirdal	58.8328	6.18415		2015	Muscle		Captive	Control of feeding experiment	4	0	-21.85	0.13	-22	-21.7	0.3	8.02	0.25	7.9	8.4	0.5																No
Wang et al., 2018	Fish	Salmo salar	Adult		Carnivore	Europe	Yes	Norway	Dirdal	58.8328	6.18415		2015	Muscle		Captive	Feeding experiment with insects as main protein	4	2	-23.12	0.05	-23.2	-23.1	0.1	7.47	0.15	7.3	7.6	0.3																No
